# Supplementary material for: Association between diversity levels of member composition in group activities of older adults and the occurrence of need for care: The JAGES 2013-2019 longitudinal study
Source: Research Square preprint supplement (doi:10.21203/rs.3.rs-2356126/v1), 2022-12-16
Supplement: Supplementary file 1 [file 0a75878cad2c24e28abf0077.xlsx]

## Sheet: Table7 MI前の就労なしの回帰分析結果 
	Table.7 Combined prevalence and 95% confidence intervals for long-term care certification for those not working , estimated by Cox proportional hazards model with complete data
	Characteristics	HR(95%CI)
		Model crude	P value	Model1a	P value
	Diversity level(range0-3)
	Level 0	reference		reference
	Level 1	0.75(0.70-0.80)	<0.001	0.83(0.77-0.89)	<0.001
	Level 2	0.60(0.56-0.64)	<0.001	0.75(0.69-0.82)	<0.001
	Level 3	0.50(0.49-0.55)	<0.001	0.65(0.58-0.73)	<0.001
	Each dimension of diversity
	Gender	1.30(1.14-1.47)	<0.001	1.12(0.97-1.30)	0.118
	Residential area	0.73(0.67-0.79)	<0.001	0.82(0.75-0.89)	<0.001
	Age composition	0.89(0.83-0.96)	0.003	0.95(0.87-1.03)	0.241
	CI, confidence interval. a.Hazard ratios of the diversity level estimated by cox proportional hazard model, adjusted for sex, age , education, equivalent income , current work status, marital status, population density, medical history (heart disease, cerebrovascular disease, cancer) frequency of seeing friends or acquaintances, frequency of going out.
