# Supplementary material for: Association between diversity levels of member composition in group activities of older adults and the occurrence of need for care: The JAGES 2013-2019 longitudinal study
Source: Research Square preprint supplement (doi:10.21203/rs.3.rs-2356126/v1), 2022-12-16
Supplement: Supplementary file 2 [file 6b4de6efd79e00b95e8c10e5.xlsx]

## Sheet: Table1 
	Table.1 Characteristics of participants who have been certified as needing long-term care and who have not been certified as needing long-term care
	Characteristics	Long-term care certification, n(%)a		P value
		Yes	No
	total	12,765(20.8)	48,516(79.2)
	Diversity levelb
	Level 0	5,427(42.5)	18,173(37.5)	<0.001
	Level 1	1,761(13.8)	6,092(12.5)
	Level 2	991(7.8)	5,653(11.7)
	Level 3	522(4.1)	3,438(7.1)
	Each dimension of diversity
	Gender	3,131(24.5)	15,895(32.8)	<0.001
	Residential area	1,307(10.2)	8,396(17.3)	<0.001
	Age composition	1,443(11.3)	8,435(17.4)	<0.001
	Age,mean(SD)
	65<74	3,567(27.9)	33,599(69.3)	<0.001
	≥75	9,198(72.1)	14,917(30.7)
	sex
	Men	5,641(44.2)	23,118(47.7)	<0.001
	Women	7,124(55.8)	25,398(52.3)
	Current workers	1,335(10.5)	11,922(24.6)	<0.001
	Marital Status
	Married	7,746(60.7)	36,152(74.5)	<0.001
	Single	259(2.0)	1,034(2.1)
	Widowed/divorced	4,281(33.5)	10,101(20.8)
	Population density
	Rural	1,977(15.5)	7,630(15.7)	<0.001
	Suburbs	5,831(45.7)	24,851(51.2)
	City	4,957(38.8)	16,035(33.1)
	Comorbidity
	Cancer	619(4.8)	1546	<0.001
	Cardiac disease	1,864(14.6)	4,474(9.2)	<0.001
	Stroke	597(4.7)	1,219(2.5)	<0.001
	Income
	<1.5 million yen	3,590(28.1)	11,158(23.0)	<0.001
	1.5-2.4 million yen	4,089(32.0)	17,613(36.3)
	≧2.5 million yen	2,563(20.1)	12,901(26.6)
	Education
	<9 years	5,864(45.9)	17,998(37.1)	<0.001
	10-12 years	4,350(34.1)	19,416(40.0)
	≧13years	2,179(17.1)	10,369(21.4)
	Frequency of meeting acquaintances(more than once a week)	5,591(43.8)	24,271(50.0)	<0.001
	Frequency of going out(more than once a week)	7,833(37.9)	37,636(77.6)	<0.001
	a.The total numbers may vary across the characteristics because of missing data. The percentage may not total 100 because of rounding. b.We assessed three dimensions of the diversity (gender, residential area, and age composition) of the group in which each participant was involved most frequently. We then graded the diversity level into five categories: level 0 (not involved in any groups), leve…
