# Supplementary material for: Association between diversity levels of member composition in group activities of older adults and the occurrence of need for care: The JAGES 2013-2019 longitudinal study
Source: Research Square preprint supplement (doi:10.21203/rs.3.rs-2356126/v1), 2022-12-16
Supplement: Supplementary file 3 [file 82aed56374f46aa3b1c9a81a.xlsx]

## Sheet: Table2
	Table.2 Combined prevalence ratios and 95% confidence intervals for long-term care certification estimated by cox proportional hazard model with multiply imputed data
	Characteristics	HR(95%CI)
		Model crude	P value	Model1a	P value
	Diversity level(range0-3)
	Level 0	reference		reference
	Level 1	0.84(0.79-0.89)	<0.001	0.86(0.81-0.90)	<0.001
	Level 2	0.70(0.66-0.75)	<0.001	0.80(0.75-0.86)	<0.001
	Level 3	0.62(0.57-0.67)	<0.001	0.76(0.70-0.82)	<0.001
	Each dimension of diversity
	Gender	1.29(1.17-1.42)	<0.001	1.10(0.99-1.22)	0.081
	Residential area	0.77(0.73-0.82)	<0.001	0.89(0.84-0.94)	<0.001
	Age composition	0.89(0.84-0.94)	<0.001	0.98(0.93-1.04)	0.575
	Age
	75～			4.18(4.02-4.36)	<0.001
	Women			1.00(0.96-1.04)	0.964
	Current workers			0.64(0.60-0.67)	<0.001
	Marital Status
	Married			reference
	Single			1.33(1.28-1.39)	<0.001
	Widowed/divorced			1.26(1.06-1.49)	0.009
	Population density
	Rural			reference
	Suburbs			0.84(0.81-0.87)	<0.001
	City			0.78(0.74-0.82)	<0.001
	Cancer			1.54(1.42-1.67)	<0.001
	Cardiac disease			1.30(1.28-1.39)	<0.001
	Stroke			1.51(1.39-1.64)	<0.001
	Income
	<1.5 million yen			reference
	1.5-2.4 million yen			0.88(0.84-0.92)	<0.001
	≧2.5 million yen			0.84(0.79-0.88)	<0.001
	Education
	<9 years			reference
	10-12 years			0.93(0.89-0.96)	<0.001
	≧13years			0.93(0.88-0.98)	0.005
	Frequency of meeting acquaintances(more than once a week)			0.87(1.11-1.20)	<0.001
	Frequency of going out(more than once a week)			0.54(0.84-0.90)	<0.001
	CI, confidence interval. a.Hazard ratios of the diversity level estimated by cox proportional hazard model, adjusted for sex, age , education, equivalent income , current work status, marital status, population density, medical history (heart disease, cerebrovascular disease, cancer) frequency of seeing friends or acquaintances, frequency of going out.
