# Supplementary material for: Association between diversity levels of member composition in group activities of older adults and the occurrence of need for care: The JAGES 2013-2019 longitudinal study
Source: Research Square preprint supplement (doi:10.21203/rs.3.rs-2356126/v1), 2022-12-16
Supplement: Supplementary file 4 [file a3759aaa6831118185349908.xlsx]

## Sheet: Table8 参加グループが1つのみの対象者の全析結果 
	Table.8 Combined prevalence and 95% confidence intervals of long-term care estimated by Cox proportional hazards models with multiple imputation data (subjects in one participation group only,n=11,921)
	Characteristics	HR(95%CI)
		Model crude	P value	Model1a	P value
	Diversity level(range0-3)	0.88(0.84-0.92)	<0.001	0.93(0.89-0.98)	0.004
	Level 0	reference		reference
	Level 1	0.93(0.82-1.06)	0.295	0.93(0.82-1.05)	0.246
	Level 2	0.76(0.66-0.86)	<0.001	0.86(0.76-0.98)	0.023
	Level 3	0.70(0.59-0.83)	<0.001	0.83(0.70-0.98)	0.027
	Each dimension of diversity
	Gender	1.34(1.09-1.66)	0.006	1.13(0.92-1.40)	0.232
	Residential area	0.74(0.66-0.85)	<0.001	0.87(0.77-0.99)	0.033
	Age composition	0.92(0.82-1.03)	0.132	0.99(0.89-1.11)	0.893
	CI, confidence interval. a.Hazard ratios of the diversity level estimated by cox proportional hazard model, adjusted for sex, age , education, equivalent income , current work status, marital status, population density, medical history (heart disease, cerebrovascular disease, cancer) frequency of seeing friends or acquaintances, frequency of going out.
