# Supplementary material for: Association between diversity levels of member composition in group activities of older adults and the occurrence of need for care: The JAGES 2013-2019 longitudinal study
Source: Research Square preprint supplement (doi:10.21203/rs.3.rs-2356126/v1), 2022-12-16
Supplement: Supplementary file 5 [file a8bc8950079a608fd8d2b159.xlsx]

## Sheet: Table5 MI前全体の回帰分析結果
	Table.5 Combined prevalence ratios and 95% confidence intervals for long-term care estimated by cox proportional hazard model with complete data
	Characteristics	HR(95%CI)
		Model crude	P value	Model1a	P value
	Diversity level(range0-3)
	Level 0	reference		reference
	Level 1	0.81(0.76-0.86)	<0.001	0.83(0.77-0.89)	<0.001
	Level 2	0.61(0.57-0.65)	<0.001	0.75(0.69-0.81)	<0.001
	Level 3	0.53(0.48-0.58)	<0.001	0.68(0.61-0.76)	<0.001
	Each dimension of diversity
	Gender	1.33(1.18-1.49)	<0.001	1.14(0.99-1.31)	0.063
	Residential area	0.74(0.69-0.79)	<0.001	0.84(0.78-0.91)	<0.001
	Age composition	0.85(0.79-0.91)	<0.001	0.96(0.88-1.04)	0.321
	CI, confidence interval. a.Hazard ratios of the diversity level estimated by cox proportional hazard model, adjusted for sex, age , education, equivalent income , current work status, marital status, population density, medical history (heart disease, cerebrovascular disease, cancer) frequency of seeing friends or acquaintances, frequency of going out.
