# Supplementary material for: Association between diversity levels of member composition in group activities of older adults and the occurrence of need for care: The JAGES 2013-2019 longitudinal study
Source: Research Square preprint supplement (doi:10.21203/rs.3.rs-2356126/v1), 2022-12-16
Supplement: Supplementary file 6 [file b19ef9d292e7a9a8211de98d.xlsx]

## Sheet: Table6 MI前の就労有りの回帰分析結果
	Table.6 Combined prevalence and 95% confidence intervals for long-term care certification for those who work, estimated by Cox proportional hazards model with complete data
	Characteristics	HR(95%CI)
		Model crude	P value	Model1a	P value
	Diversity level(range0-3)
	Level 0	reference		reference
	Level 1	0.91(0.75-1.111)	0.364	0.86(0.69-1.07)	0.173
	Level 2	0.68(0.56-0.84)	<0.001	0.68(0.54-0.86)	0.001
	Level 3	0.84(0.67-1.04)	0.115	0.89(0.70-1.14)	<0.355
	Each dimension of diversity
	Gender	1.35(0.93-1.94)	0.112	1.31(0.85-2.003)	0.223
	Residential area	0.97(0.80-1.19)	0.788	1.02(0.81-1.27)	0.9
	Age composition	0.97(0.79-1.18)	0.725	1.03(0.82-1.28)	0.829
	CI, confidence interval. a.Hazard ratios of the diversity level estimated by cox proportional hazard model, adjusted for sex, age , education, equivalent income , current work status, marital status, population density, medical history (heart disease, cerebrovascular disease, cancer) frequency of seeing friends or acquaintances, frequency of going out.
