# Supplementary material for: Association between diversity levels of member composition in group activities of older adults and the occurrence of need for care: The JAGES 2013-2019 longitudinal study
Source: Research Square preprint supplement (doi:10.21203/rs.3.rs-2356126/v1), 2022-12-16
Supplement: Supplementary file 7 [file b243085d32dcfae42ac27eb7.xlsx]

## Sheet: Table4 就労有りの回帰分析結果
	Table.4 Combined prevalence and 95% confidence intervals for long-term care certification for those who work, estimated by Cox proportional hazards model with multiple imputation data(n=13,257)
	Characteristics	HR(95%CI)
		Model crude	P value	Model1a	P value
	Diversity level(range0-3)
	Level 0	reference		reference
	Level 1	0.89(0.71-1.10)	0.273	0.89(0.72-1.10)	0.277
	Level 2	0.87(0.72-1.05)	0.031	0.87(0.72-1.05)	0.159
	Level 3	0.97(0.79-1.19)	0.131	0.96(0.79-1.19)	0.74
	Each dimension of diversity
	Gender	1.25(0.95-1.65)	0.114	1.10(0.85-1.42)	0.489
	Residential area	0.86(0.76-0.97)	0.017	0.95(0.83-1.08)	0.426
	Age composition	0.95(0.82-1.10)	0.503	1.00(0.86-1.16)	0.998
	Age
	75～			4.90(4.38-5.47)	<0.001
	Women			1.07(0.95-1.21)	0.263
	Marital Status
	Married			reference
	Single			1.30(1.38-1.48)	<0.001
	Widowed/divorced			1.37(0.84-2.25)	0.005
	Population density
	Rural			reference
	Suburbs			0.85(0.76-0.96)	0.01
	City			0.76(0.65-0.91)	0.002
	Cancer			1.53(1.18-1.98)	<0.001
	Cardiac disease			1.36(1.15-1.60)	<0.001
	Stroke			1.72(1.30-2.28)	<0.001
	Income
	<1.5 million yen			reference
	1.5-2.4 million yen			0.90(0.78-1.04)	0.147
	≧2.5 million yen			0.81(0.70-0.94)	0.005
	Education
	<9 years			reference
	10-12 years			0.90(0.80-1.03)	0.121
	≧13years			1.01(0.87-1.18)	0.89
	Frequency of meeting acquaintances(more than once a week)			0.37(0.29-0.47)	<0.001
	Frequency of going out(more than once a week)			0.89(0.79-1.00	0.041
	CI, confidence interval. a.Hazard ratios of the diversity level estimated by cox proportional hazard model, adjusted for age, gender, current workers, marital status,comorbidities, household income, educational attainment, and Population density,Frequency of meeting acquaintances,frequency of going out.
	a.Hazard ratios of the diversity level estimated by cox proportional hazard model, adjusted for sex, age , education, equivalent income , current work status, marital status, population density, medical history (heart disease, cerebrovascular disease, cancer) frequency of seeing friends or acquaintances, frequency of going out.
