# Supplementary material for: Association between diversity levels of member composition in group activities of older adults and the occurrence of need for care: The JAGES 2013-2019 longitudinal study
Source: Research Square preprint supplement (doi:10.21203/rs.3.rs-2356126/v1), 2022-12-16
Supplement: Supplementary file 8 [file fbd780e7bd93d6500436a2ed.xlsx]

## Sheet: Table3 就労なしの回帰分析結果
	Table.3 Combined prevalence and 95% confidence intervals for long-term care certification for those not working estimated by Cox proportional hazards models using multiple imputation data(n=42,964)
	Characteristics	HR(95%CI)
		Model crude	P value	Model1a	P value
	Diversity level(range0-3)
	Level 0	reference		reference
	Level 1	0.78(0.73-0.83)	<0.001	0.84(0.79-0.90)	<0.001
	Level 2	0.68(0.63-0.73)	<0.001	0.79(0.74-0.85)	<0.001
	Level 3	0.60(0.54-0.65)	<0.001	0.72(0.65-0.79)	<0.001
	Each dimension of diversity
	Gender	1.30(1.16-1.46)	<0.001	1.09(0.97-1.23)	0.142
	Residential area	0.78(0.74-0.83)	<0.001	0.88(0.83-0.93)	<0.001
	Age composition	0.93(0.80-0.99)	0.03	0.99(0.93-1.04)	0.605
	Age
	75～			4.08(3.90-4.27)	<0.001
	Women			0.99(0.95-1.04)	0.788
	Marital Status
	Married			reference
	Single			1.31(0.87-0.96)	<0.001
	Widowed/divorced			1.27(1.04-1.56)	0.001
	Population density
	Rural			reference
	Suburbs			0.83(0.80-0.87)	<0.001
	City			0.77(0.73-0.82)	<0.001
	Cancer			1.55(1.42-1.70)	<0.001
	Cardiac disease			1.32(1.24-1.39)	<0.001
	Stroke			1.51(1.37-1.65)	<0.001
	Income
	<1.5 million yen			reference
	1.5-2.4 million yen			0.87(0.83-0.92)	<0.001
	≧2.5 million yen			0.84(0.79-0.89)	<0.001
	Education
	<9 years			reference
	10-12 years			0.91(0.87-0.95)	<0.001
	≧13years			0.91(0.85-0.96)	0.001
	Frequency of meeting acquaintances(more than once a week)			0.55(0.50-0.60)	<0.001
	Frequency of going out(more than once a week)			0.87(0.84-0.90)	<0.001
	CI, confidence interval. a.Hazard ratios of the diversity level estimated by cox proportional hazard model, adjusted for age, gender, current workers, marital status,comorbidities, household income, educational attainment, and Population density,Frequency of meeting acquaintances,frequency of going out.
	a.Hazard ratios of the diversity level estimated by cox proportional hazard model, adjusted for sex, age , education, equivalent income , current work status, marital status, population density, medical history (heart disease, cerebrovascular disease, cancer) frequency of seeing friends or acquaintances, frequency of going out.
